**Conclusion:** Our data does not show any significant difference in leak rates when Tisseel is used. However, it does show that Tisseel use is associated with lower rate of re-thoracotomy in patients with anastomotic leak. This could possibly be due to smaller contained leaks. Further work is needed to determine the true benefit of Tisseel use in cardio-oesophagectomy.

### TP6.2.23

#### Does using intraoperative Tisseel reduce the leak rate in Cardio-Oesophagectomy: A single centre retrospective audit of anastomotic and chyle leaks

Iain Blake<sup>1</sup>, Stuart Chapman<sup>2</sup>, Paul Turner<sup>3</sup>

<sup>1</sup>Southport and Ormskirk NHS Trust, <sup>2</sup>Kingston Hospital NHS Foundation Trust,

<sup>3</sup>Lancashire Teaching Hospitals NHS Foundation Trust

**Aims:** Anastomotic leak and chylothorax are serious complications of cardio-oesophagectomy. The application of a tissue sealant to the anastomosis and ligated thoracic duct could be beneficial in protecting against leaks. We aimed to determine if using Tisseel, a fibrin-based tissue sealant, had any impact on anastomotic or chyle leak rates following cardio-oesophagectomy.

**Methods:** All elective cardio-oesophagectomys performed in a tertiary upper GI centre between 01/01/2013 and 01/01/2018 were identified. Patient records were retrospectively analysed to assess basic demographics; whether Tisseel was used; whether anastomotic or chyle leak occurred and if so whether this was managed conservatively or surgically.

**Results:** 245 records were available, Tisseel was used in 151 cases (61.6%). Patient demographics were similar between the Tisseel and no Tisseel groups (82.7% vs 77.7% male, mean age 66 vs 65 years). There was no significant difference in anastomotic leak (4.0% vs 7.4%,  $p=0.24$ ) or chyle leak (6.6% vs 4.3%,  $p=0.44$ ) rates. For patients who had an anastomotic leak there was a significantly lower rate of re-thoracotomy when Tisseel was used (16.7% vs 85.7%,  $p=0.021$ ). There was no significant difference in re-thoracotomy rates for chyle leak (40% vs 100%,  $p=0.085$ ).
